# Supplementary material for: Advancing Research and Treatment: An Overview of Clinical Trials in Myalgic Encephalomyelitis/Chronic Fatigue Syndrome (ME/CFS) and Future Perspectives
Source: MDPI journal article supplement (doi:10.3390/jcm13020325), 2024-01-06
Supplement: s1 [file s1]

**Supplementary Table S1:** Clinical trials investigating treatments for chronic infections in ME/CFS.

| Intervention (trial code)  | Study design (Cohort size)                          | Diagnostic criteria | Patient subgroup                                      | Treatment regime                                                            | Outcome measures                                                                                                                                                                                                                                                                                               | Outcome significance                                                                                                                                                       | Ref  |
|----------------------------|-----------------------------------------------------|---------------------|-------------------------------------------------------|-----------------------------------------------------------------------------|----------------------------------------------------------------------------------------------------------------------------------------------------------------------------------------------------------------------------------------------------------------------------------------------------------------|----------------------------------------------------------------------------------------------------------------------------------------------------------------------------|------|
| Rintatolimod (n/a)         | OPT phase I (15)                                    | 1994 CDC            | Illness severity (KPS 20-60)                          | 400 mg/week for a variable period of time followed by 1200 mg/week 6 months | <b>PROMs</b><br>1) Functional impairment (KPS)<br>2) Perceived cognitive performance (SCL-90-R)<br><br><b>Objective measures</b><br>1) Exercise tolerance (treadmill)<br><br><b>Biological endpoints</b><br>1) HHV-6 reactivation                                                                              | <b>PROMs</b><br>1) $p<0.01$<br>2) $p<0.01$<br><br><b>Objective measures</b><br>1) $p<0.01$<br><br><b>Biological endpoints</b><br>1) $p<0.001$                              | [40] |
| Rintatolimod (n/a)         | RCT (PA) phase II (Rintatolimod: 47, Placebo: 42)   | 1994 CDC            | Illness severity (KPS 20-60), diagnosis >12 months    | 800 mg/week for 6 months                                                    | <b>PROMs</b><br>1) Functional impairment (KPS)<br>2) Perceived cognitive performance (SCL-90-R)<br>3) Daily activity (ADL)<br>4) Psychiatric morbidity (DIS)<br><br><b>Objective measures</b><br>1) Brain MRI<br>2) Exercise tolerance (treadmill)<br><br><b>Biological endpoints</b><br>1) HHV-6 reactivation | <b>PROMs</b><br>1) $p<0.05$<br>2) $p<0.05$<br>3) N.S.<br>4) N.S.<br><br><b>Objective measures</b><br>1) N.S.<br>2) $p<0.001$<br><br><b>Biological endpoints</b><br>1) N.S. | [41] |
| Rintatolimod (NCT00215800) | RCT (PA) phase III (Rintatolimod: 93, Placebo: 101) | 1994 CDC, 1988 CDC  | KPS: 40-60, negative anti dsDNA, diagnosis >12 months | 400 mg/week for 2 weeks, then 800 mg/week up to 40 weeks                    | <b>PROMs</b><br>1) Functional impairment (KPS)<br>2) Daily activity (ADL)<br>3) Vitality (SF-36 subscale)<br>4) General health status (SF-36 subscale)<br><br><b>Objective measures</b><br>1) Exercise tolerance (treadmill)*                                                                                  | <b>PROMs</b><br>1) $p<0.01$<br>2) N.S.<br>3) N.S.<br>4) $p<0.01$<br><br><b>Objective measures</b><br>1) $p<0.05$                                                           | [42] |

|                       |                                        |          |                                                                                           |                                                                                                                                                               |                                                                                                                                                                                                                                                                                                                                                                                                                                                              |                                                                                                                                                                            |      |
|-----------------------|----------------------------------------|----------|-------------------------------------------------------------------------------------------|---------------------------------------------------------------------------------------------------------------------------------------------------------------|--------------------------------------------------------------------------------------------------------------------------------------------------------------------------------------------------------------------------------------------------------------------------------------------------------------------------------------------------------------------------------------------------------------------------------------------------------------|----------------------------------------------------------------------------------------------------------------------------------------------------------------------------|------|
| VACV<br>(n/a)         | RCT (PA)<br>(VACV: 14,<br>Placebo: 13) | 1994 CDC | Illness severity<br>(EIS),<br>elevated EBV serum<br>IgM against VCA<br>and/or EA detected | Group 1: VACV 4g/day for 6<br>months or placebo<br><br>Group 2†: Cimetidine 500 mg<br>twice per day or probenecid<br>500 mg twice per day plus<br>VACV 4g/day | <b>PROMs</b><br>1) Physical functional<br>capacity (EI)<br><br><b>Biological endpoints</b><br>1) EBV VCA IgM<br>2) EBV EA                                                                                                                                                                                                                                                                                                                                    | <b>PROMs</b><br>1) n/a<br><br><b>Biological endpoints</b><br>1) n/a<br>2) n/a                                                                                              | [30] |
| VGCV<br>(n/a)         | OPT<br>(12)                            | 1994 CDC | Suspected viral<br>onset                                                                  | 1800 mg/day for 3 weeks<br>then 900 mg/day until 6<br>months                                                                                                  | <b>Biological endpoints</b><br>1) EBV VCA IgG and IgM<br>antibodies<br>2) Antibodies against<br>EBNA<br>3) Antibodies against EBV<br>EA<br>4) HHV-6 IgG and IgM<br>antibodies<br>5) HCMV IgG and IgM<br>antibodies                                                                                                                                                                                                                                           | <b>Biological endpoints</b><br>1) $p=0.008\ddagger$<br>2) N.S.‡<br>3) N.S.‡<br>4) N.S.‡<br>5) N.S.‡                                                                        | [32] |
| VGCV<br>(NCT00478465) | RCT (PA)<br>(VGCV: 20, Placebo:<br>10) | 1994 CDC | Suspected viral<br>onset,<br>elevated antibody<br>titers against HHV-6<br>and EBV         | 1800 mg/day for 3 weeks and<br>then 900 mg/day until 6<br>months                                                                                              | <b>PROMs</b><br>1) Fatigue (MFI-20*)<br>2) Mental fatigue (MFI-20<br>subscale)<br>3) General fatigue,<br>physical fatigue, reduced<br>activity, reduced<br>motivation (MFI-20<br>subscales)<br>4) Fatigue (FSS)<br>5) symptom severity (CDC-<br>SI)<br>6) Physical functioning<br>(self-report)<br>7) Cognitive functioning<br>(self-report)<br>8) Sleep (SAQ)<br>9) Depression (HAM-D)<br><br><b>Objective measures</b><br>1) Cognitive function<br>(PASAT) | <b>PROMs</b><br>1) N.S.<br>2) $p=0.039$<br>3) N.S.<br>4) $p=0.006$<br>5) N.S.<br>6) N.S.<br>7) $p=0.025$<br>8) N.S.<br>9) N.S.<br><br><b>Objective measures</b><br>1) N.S. | [35] |

|  | Biological endpoints                 | Biological endpoints |
|--|--------------------------------------|----------------------|
|  | 1) Monocyte and neutrophil counts    | 1) $p < 0.05$        |
|  | 2) Cytokines                         | 2) $p < 0.05$        |
|  | 3) EBV and HHV-6 IgG antibody titers | 3) N.S.              |

#### Abbreviations:

1988 CDC: 1988 Centers for Disease Control and Prevention criteria for CFS by Holmes, 1994 CDC: 1994 CDC criteria for CFS by Fukuda, CDC-SI: CDC symptom inventory scores, DIS: diagnostic interview schedule, dsDNA: double-stranded deoxyribonucleic acid, EA: early antigens, EBV: Epstein Barr virus, EBNA: EBV nuclear antigens, EI: energy index, FSS: fatigue severity scale, HAM-D: Hamilton depression rating scale, HCMV: human cytomegalovirus, HHV-6: human herpesvirus-6, IgG: immunoglobulin G, IgM: immunoglobulin M, KPS: Karnofsky performance scale, MFI-20: 20-item multidimensional fatigue inventory, MRI: magnetic resonance imaging, n/a: not available, N.S.: not significant, OPT: open-label pilot study, PA: parallel arm, PASAT: paced auditory serial addition test, PROMs: patient-reported outcome measures, RCT: randomized placebo-controlled double-blinded clinical trial, SAQ: sleep assessment questionnaire, SCL-90-R: symptom checklist 90-R, VACV: valacyclovir, VGCV: valganciclovir, VCA: viral capsid antigen.

#### Trial codes:

NCT: ClinicalTrials.gov

#### Footnotes:

\* Marks a primary outcome measure

† After 3 months of VCV, if the EI point score did not improve, participants from group 1 were switched to group 2.

‡  $P$  values reported for “responders”

**Supplementary Table S2:** Clinical trials investigating treatments for immune disturbances in ME/CFS.

| Intervention (trial code)      | Study design (Cohort size) | Diagnostic criteria | Patient subgroup                                                                       | Treatment regime                                                                                               | Outcome measures                                                                                                                                                                                                                                                                                                                                                                       | Outcome significance                                                                                                                                                                                                                                                                                                           | Ref  |
|--------------------------------|----------------------------|---------------------|----------------------------------------------------------------------------------------|----------------------------------------------------------------------------------------------------------------|----------------------------------------------------------------------------------------------------------------------------------------------------------------------------------------------------------------------------------------------------------------------------------------------------------------------------------------------------------------------------------------|--------------------------------------------------------------------------------------------------------------------------------------------------------------------------------------------------------------------------------------------------------------------------------------------------------------------------------|------|
| <b>Autoimmunity</b>            |                            |                     |                                                                                        |                                                                                                                |                                                                                                                                                                                                                                                                                                                                                                                        |                                                                                                                                                                                                                                                                                                                                |      |
| Cyclophosphamide (NCT02444091) | OPT phase II (40)          | CCC                 | Disease duration >2 years                                                              | 6 infusions (first infusion 600 mg/m <sup>2</sup> followed by 700 mg/m <sup>2</sup> ) at monthly intervals     | <b>PROMs</b><br>1) Fatigue*†<br>2) Functional level†<br>3) Vitality, social function, bodily pain (SF-36 subscales)<br>4) Fatigue (FSS)<br>5) Physical function (SF-36 subscale)<br>6) Physical activity (SF-36-PCS)<br><br><b>Objective measures</b><br>1) Physical activity (number of steps)                                                                                        | <b>PROMs</b><br>1) N.S. (3 months); $p<0.001$ (6, 9, 12, 15, 18 months)‡<br>2) N.S. (3 months); $p<0.01$ (6 months); $p<0.001$ (9, 12, 15, 18 months)<br>3) n/a<br>4) n/a<br>5) $p<0.001$ (3, 6, 9, 12, 15, 18 months)<br>6) n/a<br><br><b>Objective measures</b><br>1) $p<0.01$ (17-18 months), $p<0.001$ (7-9, 11-12 months) | [70] |
| Immunoadsorption(n/a)          | POC (10)                   | CCC                 | Infection-triggered onset, severity (Bell scale of <50), elevated $\beta$ 2 antibodies | 5 cycles of immunoadsorption at days 1-3 and 6-7. After the 5 <sup>th</sup> cycle patients received 25g IV IgG | <b>PROMs</b><br>1) Symptom severity†<br>2) Fatigue and cognitive impairment (FACT-F)<br><br><b>Objective measures</b><br>1) Muscle strength (pinch dynamometer)<br>2) Physical activity (steps/day)<br><br><b>Biological endpoints</b><br>1) $\beta$ 1 and $\beta$ 2 IgG<br>2) M3/M4 receptor IgG<br>3) Total serum IgG<br>4) Tetanus IgG and PcP IgG<br>5) Endothelial function (PAT) | <b>PROMs</b><br>1) n/a<br>2) $p=0.038$ (3 months), $p=0.045$ (6 months)<br><br><b>Objective measures</b><br>1) N.S.<br>2) N.S.<br><br><b>Biological endpoints</b><br>1) N.S. (3 months), $p<0.05$ (6 months)<br>2) N.S.<br>3) N.S.<br>4) N.S.<br>5) N.S.                                                                       | [72] |

|                            |                                                      |                 |                                                                             |                                                                                                                                               |                                                                                                                                                                                                                                                                                                                                                                                                                        |                                                                                                                                                                                    |      |
|----------------------------|------------------------------------------------------|-----------------|-----------------------------------------------------------------------------|-----------------------------------------------------------------------------------------------------------------------------------------------|------------------------------------------------------------------------------------------------------------------------------------------------------------------------------------------------------------------------------------------------------------------------------------------------------------------------------------------------------------------------------------------------------------------------|------------------------------------------------------------------------------------------------------------------------------------------------------------------------------------|------|
| Rituximab<br>(NCT00848692) | RCT (PA) phase II<br>(Rituximab: 15,<br>Placebo: 15) | 1994 CDC        | -                                                                           | Treatment: 2 infusions of 500<br>mg/m <sup>2</sup> , 2 weeks apart<br><br>Placebo: 2 infusions of equal<br>volume of saline, 2 weeks<br>apart | <b>PROMs</b><br>1) Fatigue severity at 3<br>months post<br>intervention*†<br>2) Fatigue severity†<br>3) Symptom severity†<br>4) Physical health (SF-36<br>subscale)<br>5) Physical function (SF-36<br>subscale)<br>6) Bodily pain (SF-36<br>subscale)<br>7) General health, social<br>function, role emotional,<br>mental health (SF-36<br>subscales)<br><br><b>Other</b><br>1) Physician assessed<br>fatigue severity | <b>PROMs</b><br>1) N.S.<br><br>2) <i>p</i> =0.045<br>3) n/a<br>4) <i>p</i> =0.039<br>5) <i>p</i> =0.014<br>6) <i>p</i> =0.005<br>7) N.S.<br><br><b>Other</b><br>1) <i>p</i> =0.021 | [66] |
| Rituximab<br>(NCT01156909) | OPT phase II<br>(28)                                 | 1994 CDC<br>CCC | -                                                                           | 2 infusions of 500 mg/m <sup>2</sup> , 2<br>weeks apart<br>Maintenance infusions at 3,<br>6, 10, and 15 months                                | <b>PROMs</b><br>1) Fatigue severity†<br>2) Health related quality of<br>life (SF-36)                                                                                                                                                                                                                                                                                                                                   | <b>PROMs</b><br>1) n/a§<br>2) N.S. (3 months); <i>p</i> <0.01<br>(15 months); <i>p</i> <0.001 (6, 10,<br>20, 30, 36 months); <i>p</i> <0.0001<br>(24 months)                       | [67] |
| Rituximab<br>(NCT02229942) | RCT (PA)<br>(Rituximab: 77,<br>Placebo: 74)          | CCC             | Disease duration 2-<br>15 years (or ≥5 years<br>if the disease was<br>mild) | 2 infusions of 500 mg/m <sup>2</sup><br>Rituximab, 2 weeks apart<br>Maintenance infusions at 3,<br>6, 9, and 12 months                        | <b>PROMs</b><br>1) Fatigue severity†<br>2) Health related quality of<br>life (SF-36)<br>3) Fatigue severity (FSS)<br><br><b>Objective measures</b><br>1) Physical activity<br>(number of steps)                                                                                                                                                                                                                        | <b>PROMs</b><br>1) N.S.<br>2) N.S.<br>3) N.S.<br><br><b>Objective measures</b><br>1) N.S.                                                                                          | [68] |
| <b>Immunodeficiency</b>    |                                                      |                 |                                                                             |                                                                                                                                               |                                                                                                                                                                                                                                                                                                                                                                                                                        |                                                                                                                                                                                    |      |
| IVIG<br>(n/a)              | RCT (PA)<br>(IVIG:<br>23, Placebo: 26)               | 1988 CDC        | -                                                                           | 3 doses of IVIG<br>(2g/kg/month)<br><br>Placebo: 10% w/v maltose in<br>equivalent volume                                                      | <b>PROMs</b><br>1) Physical wellbeing<br>(QAL)<br>2) Depression (Hamilton<br>score)<br>3) Depression (Zung scale)                                                                                                                                                                                                                                                                                                      | <b>PROMs</b><br>1) <i>p</i> <0.01<br>2) <i>p</i> <0.01<br>3) n/a                                                                                                                   | [77] |

|                           |                                                                             |          |                               |                                                                                                                                               |                                                                                                                                                                                                                                      |                                                                                                                                                         |      |
|---------------------------|-----------------------------------------------------------------------------|----------|-------------------------------|-----------------------------------------------------------------------------------------------------------------------------------------------|--------------------------------------------------------------------------------------------------------------------------------------------------------------------------------------------------------------------------------------|---------------------------------------------------------------------------------------------------------------------------------------------------------|------|
|                           |                                                                             |          |                               |                                                                                                                                               | <b>Biological endpoints</b><br>1) T cell analysis<br>2) DTH skin testing<br><br><b>Other</b><br>1) Physician assessment of symptomatic and functional improvement                                                                    | <b>Biological endpoints</b><br>1) $p<0.01$<br>2) $p<0.01$<br><br><b>Other</b><br>1) $p=0.03$                                                            |      |
| IVIG<br>(n/a)             | RCT (PA)<br>(IVIG: 14, Placebo: 14)                                         | 1988 CDC | -                             | 6 doses of IVIG<br>(1g/kg/month)<br><br>Placebo: 1% albumin solution                                                                          | <b>PROMs</b><br>1) Symptom severity†<br>2) Physical and social functioning, health perceptions, and mental health (SF-36 subscales)<br><br><b>Biological endpoints</b><br>1) IgG subclass                                            | <b>PROMs</b><br>1) N.S.<br>2) N.S.<br><br><b>Biological endpoints</b><br>1) N.S.                                                                        | [76] |
| IVIG<br>(n/a)             | RCT (PA)<br>(0.5g/kg IVIG: 22, 1g/kg IVIG: 28, 2g/kg IVIG: 23, placebo: 26) | 1992 NIH | -                             | 3 doses of IVIG, participants randomly allocated to receive 0.5 g/kg/month, 1 g/kg/month or 2 g/kg/month)<br><br>Placebo: 1% albumin solution | <b>PROMs</b><br>1) Physical functioning (QAL)<br>2) Functional activity¶<br>3) Mood (POMS)<br>4) Functional impairment (KPS)<br><br><b>Biological endpoints</b><br>1) DTH skin testing<br>2) T cell analysis                         | <b>PROMs</b><br>1) N.S.<br>2) N.S.<br>3) N.S.<br>4) N.S.<br><br><b>Biological endpoints</b><br>1) N.S.<br>2) N.S.                                       | [79] |
| Immunoglobulin G<br>(n/a) | RCT (PA)<br>(IVIG: 36, placebo: 34)                                         | 1994 CDC | Adolescents (11-18 years old) | 3 doses (1 g/kg/month)<br><br>Placebo: 10% w/v maltose solution with 1% albumin of equivalent volume for weight                               | <b>PROMs</b><br>1) Anxiety (STAI)<br>2) Depression (BDI)<br>3) General health questionnaire<br><br><b>Biological endpoints</b><br>1) DTH skin testing<br>2) IgG subclass<br><br><b>Other</b><br>1) Functional improvement (physician | <b>PROMs</b><br>1) $p=0.01$<br>2) $p=0.002$<br>3) $p<0.001$<br><br><b>Biological endpoints</b><br>1) N.S.<br>2) N.S.<br><br><b>Other</b><br>1) $p<0.04$ | [78] |

---

assessed)

---

**Abbreviations:**

1988 CDC: 1988 Centers for Disease Control and Prevention criteria for CFS by Holmes, 1992 NIH: 1992 NIH criteria for CFS by Schluederberg, 1994 CDC: 1994 CDC criteria for CFS by Fukuda,  $\beta$ 1: beta-1 adrenergic receptors,  $\beta$ 2: beta-2 adrenergic receptors, BDI: beck depression inventory, CCC: Canadian consensus criteria for ME/CFS by Carruthers, DTH: delayed-type hypersensitivity, FACT-F: 13 item questionnaire assessing fatigue, FSS: fatigue severity scale, IgG: immunoglobulin G, IV: intravenous, IVIG: intravenous immunoglobulin therapy, M3/M4: muscarinic M3 and M4 acetylcholine receptors, OPT: open-label pilot study, PA: parallel arm, PAT: pulse arterial tonometry, PcP: pneumococcal polysaccharide, POC: proof of concept, POMS: profile of mood states, PROMs: patient-reported outcome measures, QAL: quality of life scale, RCT: randomized placebo-controlled double-blinded clinical trial, SF-36: 36-item short form health survey, SF-36-PCS: SF-36 - physical component summary, STAI: state-trait anxiety inventory.

**Trial codes:**

NCT: ClinicalTrials.gov

**Footnotes:**

\* Marks a primary outcome measure

† Assessment using unpublished questionnaires created by the authors

‡ *p* values reported for “responders”

§ *p* values not reported, but 64% of participants were said to have a “clinical response” based on fatigue severity scores

¶ Functional activity defined as the hours of self-reported non-sedentary activity per day

**Supplementary Table S3:** Clinical trials investigating treatments for metabolic disturbances in ME/CFS.

| Intervention<br>(Trial code)  | Study design<br>(Cohort size)                  | Diagnostic criteria | Patient subgroup | Treatment regime                                                                                        | Outcome measures                                                                                                                                                                                                                                                                                     | Outcome significance                                                                                                                                                                                                                                                                                                                                                          | Reference  |
|-------------------------------|------------------------------------------------|---------------------|------------------|---------------------------------------------------------------------------------------------------------|------------------------------------------------------------------------------------------------------------------------------------------------------------------------------------------------------------------------------------------------------------------------------------------------------|-------------------------------------------------------------------------------------------------------------------------------------------------------------------------------------------------------------------------------------------------------------------------------------------------------------------------------------------------------------------------------|------------|
| ALC + PLC<br>(n/a)            | OPT<br>(ALC: 29, PLC: 30,<br>ALC + PLC: 30)    | 1994 CDC            | -                | ALC group: 2 g/day<br>PLC group: 2 g/day<br>ALC+PLC group:<br>2g/day ALC and<br>2g/day PLC,<br>6 months | <b>PROMs</b><br>1) Health impression (CGI)<br><br>2) Fatigue (MFI-20)<br><br>3) Pain (MPQ-DLV)<br><br><b>Objective measures</b><br>1) Stroop test for attention concentration<br><br><b>Biological endpoints</b><br>1) Free carnitine and carnitine esters                                           | <b>PROMs</b><br>1) ALC $p<0.0001$<br>PLC $p<0.0001$<br>ALC + PLC N.S.<br>2) ALC $p=0.015$<br>PLC N.S.<br>ALC + PLC N.S.<br>3) ALC $p=0.840$<br>PLC $p=0.380$<br>ALC + PLC $p=0.877$<br><br><b>Objective measures</b><br>1) ALC $p<0.0001$<br>PLC $p=0.011$<br>ALC + PLC $p=0.004$<br><br><b>Biological endpoints</b><br>1) ALC $p<0.05$<br>PLC $p<0.05$<br>ALC + PLC $p<0.05$ | [97]       |
| CoQ10 + NADH<br>(NCT02063126) | RCT (PA)<br>(CoQ10 + NADH: 39,<br>Placebo: 34) | 1994 CDC            | -                | CoQ10: 200mg/day<br>NADH 20 mg/day<br>2 months                                                          | <b>PROMs</b><br>1) Fatigue (FIS)<br>2) Pain (MPQ)<br>3) Sleep Quality (PSQI)<br><br><b>Biological endpoints</b><br>1) Intracellular NAD+/NADH<br>2) CoQ10 levels<br>3) Lipid peroxidation<br>4) ATP production<br>5) Citrate synthase activity<br><br><b>Objective measures</b><br>1) Max HR changes | <b>PROMs</b><br>1) $p<0.05$<br>2) N.S.<br>3) N.S.<br><br><b>Biological endpoints</b><br>1) $p<0.001$<br>2) $p<0.05$<br>3) $p<0.05$<br>4) $p<0.05$<br>5) $p<0.05$<br><br><b>Objective measures</b><br>1) $p<0.05$                                                                                                                                                              | [105, 106] |

|                               |                                                |                             |                            |                                                 |                                                                                                                                                                                                                                                                                                                                                           |                                                                                                                                                                                              |       |
|-------------------------------|------------------------------------------------|-----------------------------|----------------------------|-------------------------------------------------|-----------------------------------------------------------------------------------------------------------------------------------------------------------------------------------------------------------------------------------------------------------------------------------------------------------------------------------------------------------|----------------------------------------------------------------------------------------------------------------------------------------------------------------------------------------------|-------|
|                               |                                                |                             |                            |                                                 | 2) Exercise performance (VO <sub>2</sub> , VCO <sub>2</sub> )                                                                                                                                                                                                                                                                                             | 2) N.S.                                                                                                                                                                                      |       |
|                               |                                                |                             |                            |                                                 | 3) Blood pressure (BP)                                                                                                                                                                                                                                                                                                                                    | 3) N.S.                                                                                                                                                                                      |       |
| CoQ10 + NADH<br>(NCT03186027) | RCT (PA)<br>(CoQ10 + NADH: 72,<br>Placebo: 72) | 1994 CDC                    | -                          | CoQ10: 200mg/day<br>NADH 20mg/day<br>3 months   | <b>PROMs</b><br>1) Fatigue (FIS)<br>2) Sleep Quality (PSQI)<br>3) Health-related<br>quality of life (SF-36)                                                                                                                                                                                                                                               | <b>PROMs</b><br>1) <i>p</i> =0.022<br>2) <i>p</i> =0.018<br>3) N.S.                                                                                                                          | [107] |
| CoQ10 + Se<br>(NCT05128292)   | OPT<br>(30)                                    | 1994 CDC                    | -                          | CoQ10: 400 mg/day<br>Se: 200 µg/day<br>2 months | <b>PROMs</b><br>1) Fatigue (FIS)<br>2) Sleep Quality (PSQI)<br>3) Health-related<br>quality of life (SF-36)<br><br><b>Biological endpoints</b><br>1) Total antioxidant<br>capacity<br>2) Lipid peroxidation<br>3) Inflammatory<br>response (IL-1β, IL-6,<br>IL-8, IL-10, TNF-α, and<br>CRP)<br>4) Cardiovascular<br>dysfunction (FGF-21<br>and NT-proBNP) | <b>PROMs</b><br>1) <i>p</i> =0.021<br>2) N.S.<br>3) <i>p</i> =0.002<br><br><b>Biological endpoints</b><br>1) <i>p</i> <0.0001<br><br>2) <i>p</i> <0.0001<br>3) <i>p</i> <0.01<br><br>4) N.S. | [108] |
| D-ribose<br>(n/a)             | OPT<br>(36)                                    | 1994 CDC (CFS)<br>ACR (FMS) | CFS and/or FMS<br>patients | D-ribose TID 5 g/day<br>3 weeks                 | <b>PROMs</b><br>1) Energy level (DVAS)<br>2) Sleep (DVAS)<br>3) Mental clarity<br>(DVAS)<br>4) Pain (DVAS)<br>5) Well-being (DVAS)                                                                                                                                                                                                                        | <b>PROMs</b> <sup>†</sup><br>1) <i>p</i> <0.0001<br>2) <i>p</i> =0.0001<br>3) <i>p</i> =0.003<br>4) <i>p</i> =0.026<br>5) <i>p</i> <0.0001                                                   | [117] |
| D-ribose<br>(NCT01108549)     | OPT<br>(226)                                   | 1994 CDC (CFS)<br>ACR (FMS) | CFS and/or FMS<br>patients | D-ribose TID 5 g/day<br>3 weeks                 | <b>PROMs</b><br>1) Energy level (DVAS)<br>2) Sleep (DVAS)                                                                                                                                                                                                                                                                                                 | <b>PROMs</b> <sup>†</sup><br>1) <i>p</i> <0.0001<br>2) <i>p</i> <0.0001                                                                                                                      | [118] |

|                      |                  |          |                |                                                                                                                         |                                                                                                                                                                                                                                                                        |                                                                                                                                                     |       |
|----------------------|------------------|----------|----------------|-------------------------------------------------------------------------------------------------------------------------|------------------------------------------------------------------------------------------------------------------------------------------------------------------------------------------------------------------------------------------------------------------------|-----------------------------------------------------------------------------------------------------------------------------------------------------|-------|
|                      |                  |          |                |                                                                                                                         | 3) Mental clarity (DVAS)                                                                                                                                                                                                                                               | 3) $p<0.0001$                                                                                                                                       |       |
|                      |                  |          |                |                                                                                                                         | 4) Pain (DVAS)                                                                                                                                                                                                                                                         | 4) $p<0.0001$                                                                                                                                       |       |
|                      |                  |          |                |                                                                                                                         | 5) Well-being (DVAS)                                                                                                                                                                                                                                                   | 5) $p<0.0001$                                                                                                                                       |       |
| GAA<br>(NCT02213679) | RCT (CO)<br>(21) | 1994 CDC | -              | GAA: 2.4 g/day<br>3 months                                                                                              | <b>PROMs</b><br>1) Fatigue (FIS)<br>2) Health-related quality of life (SF-36)<br><br><b>Objective measures</b><br>1) Daily physical activity (actigraphy)<br>2) Muscular strength (maximum isometric strength)<br><br><b>Biological endpoints</b><br>1) Serum creatine | <b>PROMs</b><br>1) N.S.<br>2) N.S.<br><br><b>Objective measures</b><br>1) $p<0.05$<br>2) $p<0.05$<br><br><b>Biological endpoints</b><br>1) $p<0.01$ | [91]  |
| HRG80™<br>(n/a)      | OPT<br>(188)     | 1994 CDC | Severe illness | Capsules of 200 mg HRG80 or tablets of 100 mg HRG80<br>One or two tablets/day<br>1 month                                | <b>PROMs</b><br>1) Composite score of energy, wellbeing and mental clarity (VAS)*<br>2) Energy (VAS)<br>3) Sleep (VAS)<br>4) Pain (VAS)<br>5) Wellbeing (VAS)<br>6) Mental clarity (VAS)<br>7) Stamina (VAS)                                                           | <b>PROMs</b><br>1) $p<0.001$<br>2) $p<0.001$<br>3) $p<0.001$<br>4) $p<0.001$<br>5) $p<0.001$<br>6) $p<0.001$<br>7) $p<0.001$                        | [110] |
| KPAX002<br>(n/a)     | POC<br>(15)      | 1994 CDC | -              | Methylphenidate: 5 mg BID the first 5 days, then scaled to 10 mg BID<br>Mitochondria formula: 4 tablets BID<br>3 months | <b>PROMs</b><br>1) Fatigue (CIS total)*<br>2) Concentration disturbance (CIS subscale)<br>3) Fatigue (VAS)<br>4) Concentration (VAS)                                                                                                                                   | <b>PROMs</b><br>1) $p<0.0001$<br>2) $p<0.0001$<br>3) $p<0.0001$<br>4) $p<0.0001$                                                                    | [119] |

|                                        |                                           |                                  |   |                                                                                                                                                      |                                                                                                                                                                                                                                      |                                                                                                                                                                                                            |       |
|----------------------------------------|-------------------------------------------|----------------------------------|---|------------------------------------------------------------------------------------------------------------------------------------------------------|--------------------------------------------------------------------------------------------------------------------------------------------------------------------------------------------------------------------------------------|------------------------------------------------------------------------------------------------------------------------------------------------------------------------------------------------------------|-------|
| KPAX002<br>(NCT01966276)               | RCT (PA)<br>(KPAX002: 63, Placebo:<br>65) | 1994 CDC                         | - | Methylphenidate: 5<br>mg TID the first 5 days,<br>then scaled to 10 mg<br>TID<br>Mitochondria formula:<br>4 tablets TID<br>3 months                  | <b>PROMs</b><br>1) Fatigue (CIS total)*<br>2) Fatigue (VAS)<br>3) Concentration<br>disturbance (VAS)                                                                                                                                 | <b>PROMs</b><br>1) N.S.<br>2) N.S.<br>3) N.S.                                                                                                                                                              | [120] |
| L-carnitine and<br>Amantadine<br>(n/a) | RCT (CO)<br>(28)                          | 1994 CDC<br>Australian<br>Oxford | - | Two months of<br>treatment with 1g TID<br>L-carnitine or<br>100mg/day<br>amantadine‡, 2 week<br>washout period, two<br>months in the<br>opposite arm | <b>PROMs</b><br>1) Fatigue (FSS)<br>2) Depression (BDI)<br>3) Psychiatric<br>symptoms (SCL-90-R)<br>4) CFS impairment<br>(CFS-II)<br>5) CFS severity (CFS-SI)                                                                        | <b>PROMs</b> §<br>1) N.S. (4 weeks, 8<br>weeks)<br>2) $p<0.05$ (4 weeks, 8<br>weeks)<br>3) $p<0.05$ (4 weeks, 8<br>weeks)<br>4) $p<0.05$ (4 weeks, 8<br>weeks)<br>5) N.S. (4 weeks),<br>$p<0.05$ (8 weeks) | [96]  |
| NADH<br>(n/a)                          | RCT (CO)<br>(26)                          | 1994 CDC                         | - | NADH 10 mg/day<br>1 month                                                                                                                            | <b>PROMs</b><br>1) Symptom severity¶<br><br><b>Biological endpoints</b><br>1) Urinalysis (5-HIAA)                                                                                                                                    | <b>PROMs</b><br>1) $p<0.05$<br><br><b>Biological endpoints</b><br>1) $p<0.05$                                                                                                                              | [100] |
| NADH<br>(n/a)                          | RCT (PA)<br>(NADH: 36, Placebo:<br>41)    | 1994 CDC                         | - | NADH 20 mg/day<br>2 months                                                                                                                           | <b>PROMs</b><br>1) Fatigue (VAS, FIS)<br>2) Functional<br>impairment (KPS)<br>3) Mood (HAD)<br>4) Health related<br>quality of life (SF-36)<br>5) Sleep (PSQI)<br><br><b>Objective measures</b><br>1) Heart rate<br>2) SBP<br>3) DBP | <b>PROMs</b><br>1) N.S.<br>2) N.S.<br>3) $p<0.05$<br>4) N.S.<br>5) N.S.<br><br><b>Objective measures</b><br>1) $p<0.05$<br>2) N.S.<br>3) N.S.                                                              | [99]  |

|                               |                                                |          |   |                                                                              |                                                                                                                                                                                                                                                                                                                                                                           |                                                                                                                                                                                                       |       |
|-------------------------------|------------------------------------------------|----------|---|------------------------------------------------------------------------------|---------------------------------------------------------------------------------------------------------------------------------------------------------------------------------------------------------------------------------------------------------------------------------------------------------------------------------------------------------------------------|-------------------------------------------------------------------------------------------------------------------------------------------------------------------------------------------------------|-------|
| Oxaloacetate<br>(NCT04592354) | OPT<br>(76)                                    | 1994 CDC | - | 500 mg BID (n=23),<br>1,000 mg BID (n=29),<br>1,000 mg TID (n=24)<br>6 weeks | <b>PROMs</b><br>1) Fatigue (CFQ)                                                                                                                                                                                                                                                                                                                                          | <b>PROMs</b><br>1) $p<0.005$                                                                                                                                                                          | [98]  |
| Ubiquinol-10<br>(n/a)         | OPT<br>(20)                                    | 1994 CDC | - | Ubiquinol-10: 150<br>mg/day<br>2 months                                      | <b>PROMs</b><br>1) Fatigue (CFQ)<br>2) Depression (CES-D)<br><br><b>Objective measures</b><br>1) Arithmetic task<br>(Uchida-Kraepelin<br>Psychodiagnostic Test)<br>2) Sleep-wake cycle<br>(Life Scope)<br>3) ANS function (APG)<br><br><b>Biological endpoints</b><br>1) CoQ10 levels<br>2) Oxidation activity<br>(d-ROMs test),<br>3) Antioxidant activity<br>(BAP test) | <b>PROMs</b><br>1) N.S.<br>2) $p<0.01$<br><br><b>Objective measures</b><br>1) $p<0.01$<br><br>2) $p<0.01$<br><br>3) N.S.<br><br><b>Biological endpoints</b><br>1) $p<0.001$<br>2) N.S.<br><br>3) N.S. | [104] |
| Ubiquinol-10<br>(n/a)         | RCT (PA)<br>(Ubiquinol-10: 14,<br>Placebo: 17) | 1994 CDC | - | Ubiquinol-10: 150<br>mg/day<br>3 months                                      | <b>PROMs</b><br>1) Fatigue (CFQ)<br>2) Depression (CES-D)<br><br><b>Objective measures</b><br>1) Arithmetic task<br>(Uchida-Kraepelin<br>Psychodiagnostic Test)<br>2) Sleep-wake cycle<br>(Life Scope)<br>3) Autonomic nervous<br>function (APG)<br><br><b>Biological endpoints</b><br>1) CoQ10 levels<br>2) Oxidation activity<br>(d-ROMs test),                         | <b>PROMs</b><br>1) N.S.<br>2) N.S.<br><br><b>Objective measures</b><br>1) $p<0.05$<br><br>2) N.S.<br><br>3) N.S.<br><br><b>Biological endpoints</b><br>1) $p<0.001$<br>2) N.S.                        | [104] |

---

3) Antioxidant activity      3) N.S.  
(BAP test)

---

**Abbreviations:**

1994 CDC: 1994 Centers for Disease Control and Prevention criteria for CFS by Fukuda, 5-HIAA: 5-hydroxyindoleacetic acid, ACR: American College of Rheumatology, ALC: acetyl L-carnitine, ANS: autonomic nervous system, APG: acceleration plethysmography, BAP: biological antioxidant potential, BDI: Beck depression inventory, BID: twice daily, BP: blood pressure, CES-D: Center for Epidemiologic Studies depression scale, CFS: chronic fatigue syndrome, CFS-II: chronic fatigue syndrome-impairment index, CFS-SI: chronic fatigue syndrome-severity index, CGI: clinical global impression of change, CIS: checklist individual strength, CoQ10: coenzyme Q10, CO: cross-over, CRP: C-reactive protein, DBP: diastolic blood pressure, DVAS: discrete visual analogue scale, DXA: dual X-ray absorptiometry, d-ROMs: reactive oxygen metabolite-derived compounds, FGF-21: fibroblast growth factor 21, FIS: fatigue impact scale, FMS: fibromyalgia syndrome, FSS: fatigue severity scale, GAA: guanidinoacetic acid, HADs: hospital anxiety and depression scale, HR: heart rate, HRG80™: hydroponically grown red ginseng, IL: interleukin, KPS: Karnofsky performance scale, n/a: not available, NAD+: oxidized form nicotinamide adenine dinucleotide, NADH: reduced form nicotinamide adenine dinucleotide, N.S.: not significant, NT-proBNP: amino-terminal pro-B type natriuretic peptide, MFI-20: 20-item multidimensional fatigue inventory, MPQ: McGill pain questionnaire, MPQ-DLV: McGill pain questionnaire-Dutch language version, OPT: open-label pilot study, PA: parallel arm, PLC: propionyl-L-carnitine, POC: proof of concept, PROMs: patient-reported outcome measures, PSQI: Pittsburgh sleep quality index, RCT: randomized placebo-controlled double-blinded clinical trial, SBP: systolic blood pressure, SCL-90-R: symptom checklist 90-R, Se: selenium, SF-12: 12-item short form survey, SF-36: 36-item short form health survey, SPPB: short physical performance battery, TID: three times a day, TNF-α: tumor necrosis factor-alpha, VAS: visual analogue scale, VCO<sub>2</sub>: pulmonary carbon dioxide output, VO<sub>2</sub>: pulmonary oxygen update.

**Trial codes:**

NCT: ClinicalTrials.gov

**Footnotes:**

\* Marks primary outcome measure

† *p* values reported grouped FMS only, CFS only and FMS + CFS patients together

‡ 13 of 28 enrolled patients stopped taking amantadine due to side effects

§ *p* values only given for L-carnitine treatment

¶ Assessment using unpublished questionnaires created by the authors

**Supplementary Table S4:** Clinical trials investigating treatments for gastrointestinal disturbances in ME/CFS.

| Intervention<br>(Trial code)        | Study design<br>(Cohort size)               | Diagnostic<br>criteria | Patient subgroup                                                                                     | Treatment regime                                                                                                                                                                                                                                                         | Outcome measures                                                                                                                                                                                                                                                                                                                                                                                                                                                                                  | Outcome<br>significance                                                                                                                                                                                                  | Reference |
|-------------------------------------|---------------------------------------------|------------------------|------------------------------------------------------------------------------------------------------|--------------------------------------------------------------------------------------------------------------------------------------------------------------------------------------------------------------------------------------------------------------------------|---------------------------------------------------------------------------------------------------------------------------------------------------------------------------------------------------------------------------------------------------------------------------------------------------------------------------------------------------------------------------------------------------------------------------------------------------------------------------------------------------|--------------------------------------------------------------------------------------------------------------------------------------------------------------------------------------------------------------------------|-----------|
| Antibiotic<br>(ACTRN12615000457549) | OPT<br>(22)                                 | CCC                    | Stool <i>Streptococcus</i><br>count > 10 <sup>5</sup> CFU/g                                          | 400 mg Erythromycin,<br>BID for 6 days                                                                                                                                                                                                                                   | <b>PROMs</b><br>1) Sleep (Day and sleep diary)<br>2) Mood (POMS-SF)<br>3) Symptom severity (SSH)<br><br><b>Objective measures</b><br>1) Sleep (actigraphy)<br><br><b>Biological endpoints</b><br>1) Stool <i>Streptococcus</i> count,<br><i>Enterococcus</i> count,<br><i>Lactobacillus</i> count,<br><i>Enterococcus</i> %, <i>Lactobacillus</i><br>%, <i>Bifidobacterium</i> %<br>2) Stool <i>Bifidobacterium</i> count<br>3) Stool <i>Streptococcus</i> %<br>4) Stool <i>Bifidobacterium</i> % | <b>PROMs</b><br>1) <i>p</i> =0.020<br>2) N.S.<br>3) N.S.<br><br><b>Objective measures</b><br>1) N.S.<br><br><b>Biological endpoints</b><br>1) N.S.<br><br>2) <i>p</i> =0.006<br>3) <i>p</i> =0.030<br>4) <i>p</i> =0.004 | [143]     |
| FMT<br>(NCT04158427)                | RCT (PA)<br>(FMT: 5, Placebo: 6)            | IoM                    | -                                                                                                    | Bowel preparation using polyethylene glycol, followed by FMT of 30 g of fecal transplant from a universal donor (treatment) or the same patient (placebo) <i>via</i> colonoscopy                                                                                         | <b>PROMs</b><br>1) Fatigue (VAS, MFIS)<br>2) Health related quality of life (15D, EQ-5D-3L)                                                                                                                                                                                                                                                                                                                                                                                                       | <b>PROMs</b><br>1) N.S.<br>2) N.S.                                                                                                                                                                                       | [160]     |
| Leaky gut diet<br>(n/a)             | OPT<br>(41)                                 | 1994 CDC               | Increased IgM and/or IgA in response to LPS as confirmed in previous study (Maes <i>et al.</i> 2007) | Leaky gut diet, supplemented with L-carnitine, CoQ10, taurine and lipoic acid in case of carnitine and/or CoQ10 shortage, or curcumine and quercetine in case of systemic or intracellular inflammation. Details of leaky gut diet and dosage of supplements not stated. | <b>PROMs</b><br>1) Symptom severity (FFS)<br><br><b>Biological endpoints</b><br>1) Serum IgM against bacteria<br>2) Serum IgA against bacteria                                                                                                                                                                                                                                                                                                                                                    | <b>PROMs</b><br>1) <i>p</i> <0.0001<br><br><b>Biological endpoints</b><br>1) <i>p</i> ≤0.020 <sup>†</sup><br>2) N.S.                                                                                                     | [136]     |
| Probiotic<br>(n/a)                  | RCT (PA)<br>(Probiotic: 19,<br>Placebo: 16) | CCC                    | Not bedridden                                                                                        | Probiotic (8 x 10 <sup>9</sup> CFU of <i>Lactobacillus casei</i> Shirota), TID for 8 weeks                                                                                                                                                                               | <b>PROMs</b><br>1) Depression (BDI)<br>2) Anxiety (BAI)                                                                                                                                                                                                                                                                                                                                                                                                                                           | <b>PROMs</b><br>1) N.S.<br>2) <i>p</i> <0.05                                                                                                                                                                             | [149]     |

|                                 |                                       |          |                                                                                                         |                                                                                                                                                                                                                                                                                                                                                                                                                                                                                                                                                                                     |                                                                                                                                                                                                                                                             |                                                                                                                                       |       |
|---------------------------------|---------------------------------------|----------|---------------------------------------------------------------------------------------------------------|-------------------------------------------------------------------------------------------------------------------------------------------------------------------------------------------------------------------------------------------------------------------------------------------------------------------------------------------------------------------------------------------------------------------------------------------------------------------------------------------------------------------------------------------------------------------------------------|-------------------------------------------------------------------------------------------------------------------------------------------------------------------------------------------------------------------------------------------------------------|---------------------------------------------------------------------------------------------------------------------------------------|-------|
| Probiotic (n/a)                 | OPT (15)                              | 1994 CDC | -                                                                                                       | 200 ml probiotic yogurt (10 <sup>8</sup> CFU/ml of <i>Lactobacillus</i> F19, <i>Lactobacillus acidophilus</i> NCFB 1748, <i>Bifidobacterium lactis</i> Bb12), BID 30 days                                                                                                                                                                                                                                                                                                                                                                                                           | <b>PROMs</b><br>1) Symptoms (VAS, SF-12)                                                                                                                                                                                                                    | <b>PROMs</b><br>1) N.S.                                                                                                               | [151] |
| Probiotic (n/a)                 | RCT (PA) (Probiotic:28, Placebo: 20)‡ | 1994 CDC | No GI disorders                                                                                         | Probiotic (1 x 10 <sup>10</sup> CFU of <i>Bifidobacterium infantis</i> 35264), once per day for 8 weeks                                                                                                                                                                                                                                                                                                                                                                                                                                                                             | <b>Biological endpoints</b><br>1) Inflammation (plasma IL-6)<br>2) Inflammation (plasma TNF-α, CRP)                                                                                                                                                         | <b>Biological endpoints</b><br>1) N.S.<br>2) <i>p</i> <0.05                                                                           | [150] |
| Probiotic (n/a)                 | OPT (9)                               | 1994 CDC | -                                                                                                       | <p>Week 1: Two cups of Enterelle (<i>Enterococcus faecium</i> UBEF-41, <i>Saccharomyces cerevisiae</i> spp. <i>boulardii</i>, <i>Lactobacillus acidophilus</i> LA 14)</p> <p>Week 2: Two cups of Bifiselle (<i>Bifidobacterium longum</i>, <i>B. breve</i>, <i>B. bifidum</i>, <i>B. infantis</i>) Rotanelle (<i>B. longum</i> AR81)</p> <p>Week 3: Two cups of Ramnoselle (<i>L. rhamnosus</i> GG, <i>L. acidophilus</i>) BID and two cups of Enterelle per day</p> <p>Week 4 - 8: Two cups of Citogenex (<i>L. casei</i>, <i>B. lactis</i>) and two cups of Rotanelle per day</p> | <b>PROMs</b><br>1) Physical health (SF-36)<br>2) Mental health (SF-36)<br>3) Fatigue (CFQ)<br>4) Depression (BDI-I)<br>5) Depression (BDI-II)                                                                                                               | <b>PROMs</b><br>1) N.S.<br>2) N.S.<br>3) N.S.<br>4) N.S.<br>5) N.S.                                                                   | [153] |
| Probiotic (ACTRN12614001077651) | OPT (44)                              | CCC      | Stool <i>Streptococcus</i> count > 3 x 10 <sup>5</sup> CFU/g and > 5% of total anaerobic microorganisms | <p>Week 1: baseline measurements</p> <p>Week 2: 400 mg erythromycin BID</p> <p>Week 3: 2 capsules of Pro4-50 (2.5 x 10<sup>10</sup> CFU <i>Lactobacillus rhamnosus</i>, 1.5 x 10<sup>15</sup> CFU <i>Bifidobacterium lactis</i>, 5 x 10<sup>6</sup> CFU <i>B. breve</i>, 5 x 10<sup>6</sup> CFU <i>B. longum</i>), per day</p> <p>Week 4: 400 mg erythromycin BID</p>                                                                                                                                                                                                               | <b>PROMs</b><br>1) Mood (POMS-SF)*<br>2) Mood (DASS-21)<br>3) Sleep efficiency (sleep diary)<br>4) Sleep (PSQI global score)<br>5) Sleep SOL, WASO (sleep diary)<br>6) Fatigue (MFI-20 subscale)<br>7) Brain fog (MTFQ subscale)<br>8) Total symptoms (SSH) | <b>PROMs</b><br>1) N.S.<br>2) N.S.<br>3) <i>p</i> =0.035<br>4) <i>p</i> =0.027<br>5) N.S.<br>6) N.S.<br>7) N.S.<br>8) <i>p</i> =0.001 | [152] |
|                                 |                                       |          |                                                                                                         |                                                                                                                                                                                                                                                                                                                                                                                                                                                                                                                                                                                     | <b>Objective measures</b>                                                                                                                                                                                                                                   | <b>Objective measures</b>                                                                                                             |       |

|                                             |                                                                                                                                                                                                                                                                                                                                                  |                                                                                                                                           |
|---------------------------------------------|--------------------------------------------------------------------------------------------------------------------------------------------------------------------------------------------------------------------------------------------------------------------------------------------------------------------------------------------------|-------------------------------------------------------------------------------------------------------------------------------------------|
| Week 5: 2 capsules of Pro4-50, once per day | 1) Sleep efficiency (actigraphy)*<br>2) Sustained visual attention (RVP-A')*<br>3) Sleep WASO (actigraphy)<br>4) Sleep SOL, restlessness/sleep fragmentation index (actigraphy)<br>5) Processing speed<br>6) Story memory<br>7) Cognitive flexibility<br>8) Verbal fluency<br>9) Word memory, spatial working memory, visual learning, planning) | 1) N.S.<br>2) $p < 0.001$<br>3) $p = 0.007$<br>4) N.S.<br>5) $p = 0.004$<br>6) $p = 0.002$<br>7) $p = 0.001$<br>8) $p = 0.014$<br>9) N.S. |
|                                             | <b>Biological endpoints</b><br>1) Stool <i>Streptococcus</i> count<br>2) Stool <i>Bifidobacteria</i> and <i>Lactobacillus</i> count<br>3) D-lactate (urinary D-lactate:L-lactate ratio)                                                                                                                                                          | <b>Biological endpoints</b><br>1) $p = 0.003$<br>2) N.S.<br>3) N.S.                                                                       |

#### Abbreviations:

15D: 15-dimension instrument for measuring health related quality of life, 1994 CDC: 1994 Centers for Disease Control and Prevention criteria for CFS by Fukuda, BAI: Beck anxiety inventory, BDI: Beck depression inventory, BDI-I: BDI version 1, BDI-II: BDI version 2, BID: twice daily, CCC: Canadian consensus criteria for ME/CFS by Carruthers, CFQ: Chalder fatigue questionnaire, CFU: colony-forming units, CRP: C-reactive protein, DASS-21: depression, anxiety and stress scale-21, DHEA-S: dehydroepiandrosterone sulfate, DSM: diagnostic and statistical manual of mental disorders, EQ-5D-3L: 3-level version of the EQ-5D developed by the EuroQol group, ESR: erythrocyte sedimentation rate; ESS: Epworth sleepiness scale; FFS: FibroFatigue scale, FMT: fecal microbe transplant, GI: gastrointestinal, HRQOL: health-related quality of life, IgA: immunoglobulin A, IgM, immunoglobulin M, IL-6: Interleukin-6; IoM: Institute of Medicine criteria, LPS: lipopolysaccharide, MAPI: multivariable apnoea prediction index; MFI-20: 20-item multidimensional fatigue inventory, MFIS: modified fatigue impact scale, MTFQ: multiple fatigue types questionnaire, n/a: not available, NCT: ClinicalTrials.gov study identifier, N.S.: not significant, OPT: open-label pilot study, PA: parallel-arm, POMS-SF: profile of mood states - short form, PROMS: patient-reported outcome measures, PSQI: Pittsburgh sleep quality index, RCT: randomized placebo-controlled double-blinded clinical trial, ROMs: reactive oxygen metabolite; RVP-A': rapid visual processing-A', SF-12: 12-item short form survey, SF-36: 36-item short form health survey, SOL: sleep onset latency, SSH: symptom severity and severity hierarchy chart, TID, three times a day, TNF- $\alpha$ : tumor necrosis factor-alpha, TST: total sleep time; VAS: visual analogue scale, WASO: wake after sleep onset.

#### Trial codes:

ACTRN: Australian and New Zealand Clinical Trial Registry, NCT: ClinicalTrials.gov

#### Foot notes:

\* Marks a primary outcome measure

† Antibodies against *Hafnia alvei*, *Pseudomonas aeruginosa*, *Morganella morganii*, *Pseudomonas putida*, *Citrobacter koseri* and *Klebsiella pneumoniae*, were measured ( $p = 0.005$ ,  $p = 0.01$ ,  $p = 0.004$ ,  $p = 0.001$ ,  $p = 0.001$  and  $p = 0.02$ , respectively)

‡ Apart from a ME/CFS cohort, study included cohorts of ulcerative colitis patients, psoriasis patients, and healthy controls

**Supplementary Table S5:** Clinical trials investigating treatments for neurological disturbances in ME/CFS.

| Intervention<br>(Trial code) | Study design<br>(Cohort size)                                                                                                                    | Diagnostic criteria | Patient subgroup                                                                                              | Treatment regime                                   | Outcome measures                                                                                                                                                                                                                                                                                                                                                                                                                                                                                                                                                                                                             | Outcome<br>significance                                                                                                                         | Reference |
|------------------------------|--------------------------------------------------------------------------------------------------------------------------------------------------|---------------------|---------------------------------------------------------------------------------------------------------------|----------------------------------------------------|------------------------------------------------------------------------------------------------------------------------------------------------------------------------------------------------------------------------------------------------------------------------------------------------------------------------------------------------------------------------------------------------------------------------------------------------------------------------------------------------------------------------------------------------------------------------------------------------------------------------------|-------------------------------------------------------------------------------------------------------------------------------------------------|-----------|
| Duloxetine<br>(NCT00375973)  | RCT (PA)<br>(Duloxetine: 30,<br>Placebo: 30)                                                                                                     | 1994 CDC            | Severity (MFI-20<br>general fatigue<br>subscale of $\geq 13$ )                                                | Duloxetine 60-120mg/day or placebo for<br>12 weeks | <b>PROMs</b><br>1) General fatigue*, physical<br>fatigue, reduced activity,<br>reduced motivation (MFI-20<br>subscales)<br>2) mental fatigue (MFI-20<br>subscale)<br>3) Pain severity (BPI)<br>4) Pain interference (BPI)<br>5) Anxiety and depression<br>(HADS)<br>6) Symptoms (CDC-SI)<br>7) Health related quality of life<br>(SF-36)<br>8) Improvement (PGI-I)<br>9) Severity (CGI subscale)                                                                                                                                                                                                                             | <b>PROMs</b><br>1) N.S.<br><br>2) $p=0.01$<br><br>3) $p=0.05$<br>4) $p=0.03$<br>5) N.S.<br><br>6) N.S.<br>7) N.S.<br><br>8) N.S.<br>9) $p=0.02$ | [180]     |
| Fluoxetine<br>(n/a)          | RCT (PA)<br>(Fluoxetine,<br>depressed: 21,<br>Fluoxetine, non-<br>depressed: 24,<br>Placebo, non-<br>depressed: 28,<br>Placebo<br>depressed: 23) | Oxford              | Depressed patients<br>(BDI score of $\geq 16$ )<br><br>Non-depressed<br>patients (BDI score of<br>$\leq 10$ ) | 20 mg/day Fluoxetine or placebo, for 8<br>weeks    | <b>PROMs</b><br>1) Subjective fatigue (CIS<br>subscale and daily observed<br>fatigue score) <sup>†*</sup><br>2) Depression (BDI and SCL-<br>90) <sup>†*</sup><br>3) Symptoms (SIP)*<br>4) Physical Activity (CIS subscale<br>and daily observed activity<br>score) <sup>†*</sup><br>5) Sleep (CIS subscale and daily<br>observed sleep score) <sup>†*</sup><br>6) Cognitive function (CIS<br>subscale and SIP, daily observed<br>memory and concentration<br>score) <sup>†</sup><br>7) Social interactions (SIP<br>subscale)*<br>8) Self efficacy expectations<br>(MHLC subscale and self<br>observation list) <sup>†*</sup> | <b>PROMs</b><br>1) N.S.<br><br>2) N.S.<br><br>3) N.S.<br>4) N.S.<br><br>5) N.S.<br>6) N.S.<br><br>7) N.S.<br>8) n/a                             | [177]     |

|                          |                                                                                                                                  |                      |                                                                               |                                                                                                                                                                                                                                                                                                                                                                                                                                                                                                                                                                                                                                                  |                                                                                                                                                                                                                                        |                                                                                                                                   |       |
|--------------------------|----------------------------------------------------------------------------------------------------------------------------------|----------------------|-------------------------------------------------------------------------------|--------------------------------------------------------------------------------------------------------------------------------------------------------------------------------------------------------------------------------------------------------------------------------------------------------------------------------------------------------------------------------------------------------------------------------------------------------------------------------------------------------------------------------------------------------------------------------------------------------------------------------------------------|----------------------------------------------------------------------------------------------------------------------------------------------------------------------------------------------------------------------------------------|-----------------------------------------------------------------------------------------------------------------------------------|-------|
|                          |                                                                                                                                  |                      |                                                                               |                                                                                                                                                                                                                                                                                                                                                                                                                                                                                                                                                                                                                                                  | <b>Objective measures</b><br>1) Physical activity (Actometer)<br>†*<br>2) Cognitive function (complex reaction-time test)*                                                                                                             | <b>Objective measures</b><br>1) N.S.<br>2) N.S.                                                                                   |       |
| Fluoxetine and GET (n/a) | RCT (PA)<br>(Fluoxetine and GET: 33, Placebo drug and GET: 34, Fluoxetine and placebo GET: 35, Placebo drug and placebo GET: 34) | Oxford               | -                                                                             | 20 mg/day Fluoxetine or placebo, over six months.<br>Treatment GET involved physiotherapist appointments at weeks 0, 1, 2, 4, 8, 12, 20 and 26 where they received a prescribed exercise program with a physiotherapist receiving instructions to undertake their preferred aerobic activity for 20 minutes ≥3 times a week, with activity intensity increasing when there was a consistent HR reduction of 10 bpm post exercise and reduced perceived exertion.<br>Placebo GET involved participants attending physiotherapist appointments during which they discussed 7-day activity diaries but were not offered specific exercise guidance. | <b>PROMs</b><br>1) Fatigue (CFQ)*<br>2) Health related quality of life (SF-36)<br>3) Anxiety and depression (HADS)<br><br><b>Objective measures</b><br>1) Muscle strength (HGS)<br>2) Functional work capacity‡ (ergometer)            | <b>PROMs§</b><br>1) N.S.<br>2) N.S.<br>3) p=0.04 (week 12), N.S. (week 26)<br><br><b>Objective measures§</b><br>1) n/a<br>2) N.S. | [178] |
| Fludrocortisone (n/a)    | RCT (PA)<br>(Fludrocortisone: 38, Placebo: 46)                                                                                   | 1994 CDC             | Neurally mediated hypotension (tilt table test)<br>Mild/moderate (≥65 on GWS) | Fludrocortisone acetate, titrated to 0.1 mg/day or placebo for 9 weeks                                                                                                                                                                                                                                                                                                                                                                                                                                                                                                                                                                           | <b>PROMs</b><br>1) Wellness (GWS)<br>2) Health related quality of life (SF-36)<br>3) Depression (BDI)<br>4) Mental Fatigue (WMFI)<br>5) Mood (POMS-SF)<br>6) Activity (DASI)<br><br><b>Objective measures</b><br>1) Tilt table testing | <b>PROMs</b><br>1) N.S.<br>2) N.S.<br>3) N.S.<br>4) N.S.<br>5) N.S.<br>6) N.S.<br><br><b>Objective measures</b><br>1) N.S.        | [202] |
| Fludrocortisone (n/a)    | RCT (CO)<br>(20)                                                                                                                 | 1994 CDC<br>1988 CDC | -                                                                             | 6 weeks treatment with 0.1mg/day¶ fludrocortisone or placebo, 6 weeks washout period, 6 weeks in the opposite arm.                                                                                                                                                                                                                                                                                                                                                                                                                                                                                                                               | <b>PROMs</b><br>1) Fatigue (VAS)*<br>2) Unrefreshing sleep (VAS)*<br>3) Muscle pains (VAS)*                                                                                                                                            | <b>PROMs##</b><br>1) N.S.<br>2) N.S.<br>3) N.S.                                                                                   | [203] |

- 4) Inability to concentrate (VAS)\* 4) N.S.
- 5) Headaches (VAS)\* 5) N.S.
- 6) Forgetfulness (VAS)\* 6) N.S.
- 7) Confusion (VAS)\* 7) N.S.
- 8) Joint pains (VAS)\* 8) N.S.
- 9) Painful lymph nodes (VAS)\* 9) N.S.
- 10) Sore throat (VAS)\* 10) N.S.
- 11) Light headedness (VAS)\* 11) N.S.
- 12) Depression (VAS)\* 12) N.S.
- 13) Distance before exhausted#\* 13) N.S.
- 14) Health related quality of life (SF-36)\* 14) N.S.
- 15) Mood status (PANAS) 15) N.S.

**Objective measures**

- 1) Cognitive processing speed (Hicks paradigm reaction time test)
- 2) Treadmill (time to exhaustion)

**Objective measures##**

- 1) N.S.
- 2) N.S.

|                                              |                                                              |          |   |                                                                                                                                                |                                                                                                                                                                                                                                                                                                                                                                                                                                                                                                                                               |                                                                                                                                                                                                                                                                                                                                                                                                                                |       |
|----------------------------------------------|--------------------------------------------------------------|----------|---|------------------------------------------------------------------------------------------------------------------------------------------------|-----------------------------------------------------------------------------------------------------------------------------------------------------------------------------------------------------------------------------------------------------------------------------------------------------------------------------------------------------------------------------------------------------------------------------------------------------------------------------------------------------------------------------------------------|--------------------------------------------------------------------------------------------------------------------------------------------------------------------------------------------------------------------------------------------------------------------------------------------------------------------------------------------------------------------------------------------------------------------------------|-------|
| Ginkgo and Cistanche (GkoCist) (NCT02807649) | RCT (PA)<br>(Placebo: 64,<br>Low dose: 62,<br>High dose: 64) | 1994 CDC | - | High dose (Ginkgo at 180mg/day and Cistanche at 450mg/day), low dose (Ginkgo at 120mg/day and Cistanche at 300mg/day), or placebo for 60 days. | <p><b>PROMs</b></p> <ul style="list-style-type: none"> <li>1) Physical fatigue (CFQ)</li> <li>2) Mental fatigue (CFQ)</li> <li>3) Physical health (WHOQOL subscale)</li> <li>4) Psychological health (WHOQOL subscale)</li> <li>5) Social relationships (WHOQOL subscale)</li> <li>6) Living environment (WHOQOL subscale)</li> <li>7) Sexual Life (SLQ)</li> </ul> <p><b>Biological endpoints</b></p> <ul style="list-style-type: none"> <li>1) Blood ammonia</li> <li>2) Blood lactic acid</li> <li>3) Liver and Kidney Function</li> </ul> | <p><b>PROMs</b></p> <ul style="list-style-type: none"> <li>1) <math>p&lt;0.0001</math></li> <li>2) <math>p&lt;0.0001</math></li> <li>3) <math>p=0.0024</math></li> <li>4) N.S.</li> <li>5) N.S.</li> <li>6) N.S.</li> <li>7) <math>p&lt;0.0001</math></li> </ul> <p><b>Biological endpoints</b></p> <ul style="list-style-type: none"> <li>1) <math>p=0.01</math></li> <li>2) <math>p=0.005</math></li> <li>3) N.S.</li> </ul> | [195] |
|----------------------------------------------|--------------------------------------------------------------|----------|---|------------------------------------------------------------------------------------------------------------------------------------------------|-----------------------------------------------------------------------------------------------------------------------------------------------------------------------------------------------------------------------------------------------------------------------------------------------------------------------------------------------------------------------------------------------------------------------------------------------------------------------------------------------------------------------------------------------|--------------------------------------------------------------------------------------------------------------------------------------------------------------------------------------------------------------------------------------------------------------------------------------------------------------------------------------------------------------------------------------------------------------------------------|-------|

|                           |                                          |          |                                                             |                                                                                                                                                                                                                                                                                                                      |                                                                                                                                                                                                                                                                                              |                                                                                                                                                                               |       |
|---------------------------|------------------------------------------|----------|-------------------------------------------------------------|----------------------------------------------------------------------------------------------------------------------------------------------------------------------------------------------------------------------------------------------------------------------------------------------------------------------|----------------------------------------------------------------------------------------------------------------------------------------------------------------------------------------------------------------------------------------------------------------------------------------------|-------------------------------------------------------------------------------------------------------------------------------------------------------------------------------|-------|
| Low-dose phenelzine (n/a) | RCT (PA)<br>(Phenelzine: 9, Placebo: 9)  | 1994 CDC | -                                                           | Phase 1: all participants took one placebo pill per day for 2 weeks.<br>Phase 2: active treatment group received alternating days of 15mg phenelzine pill and placebo pill for 2 weeks.<br>Phase 3: active treatment group received 15mg/day phenelzine for 2 weeks.<br>Placebo group took one placebo pill per day. | <b>PROMs</b><br>1) Functional Status (FSQ)<br>2) Mood (POMS-SF)<br>3) Depression (CES-D)<br>4) Illness Severity (ISS)<br>5) Fatigue (FSS)<br>6) Symptoms (Sx)                                                                                                                                | <b>PROMs</b><br>1) N.S.<br>2) N.S.<br>3) N.S.<br>4) N.S.<br>5) N.S.<br>6) N.S.                                                                                                | [175] |
| LDX (NCT01071044)         | RCT (PA)<br>(LDX: 15, Placebo: 11)       | 1994 CDC | Patients with executive impairment (measured using BRIEF-A) | 30 mg/day LDX for 2 weeks, 50 mg/day LDX for 2 weeks, 70 mg/day LDX for 2 weeks (dose escalation in the absence of adverse events)                                                                                                                                                                                   | <b>PROMs</b><br>1) Executive Function (BRIEF-A)<br>2) Fatigue (FSS)<br>3) Anxiety (HAM-A)<br>4) Pain (MPQ)<br>5) Fibromyalgia (FIQ)<br>6) ADHD (ADHDRS)<br>7) Severity (CGI subscale)                                                                                                        | <b>PROMs</b><br>1) $p=0.005$<br>2) $p=0.008$<br>3) N.S.<br>4) $p = 0.046$<br>5) N.S.<br>6) $p=0.038$<br>7) $p = 0.022$                                                        | [184] |
| MELATOZINC (NCT03000777)  | RCT (PA)<br>(Melatonin: 28, Placebo: 32) | 1994 CDC | -                                                           | 1mg Melatonin + 10 mg Zinc, 1 hour before sleep for 16 weeks                                                                                                                                                                                                                                                         | <b>PROMs</b><br>1) Fatigue (FIS)<br>2) Anxiety and Depression (HADS)<br>3) Sleep Quality (PSQI)<br>4) Dysautonomia (COMPASS31)<br>5) Health related quality of life (SF-36)<br><b>Biological endpoints</b><br>1) 6-sulfatoxymelatonin<br>2) Zinc                                             | <b>PROMs</b><br>1) $p<0.05$<br>2) N.S.<br>3) N.S.<br>4) N.S.<br>5) N.S.<br><b>Biological endpoints</b><br>1) $p<0.0001$<br>2) N.S.                                            | [191] |
| S-citalopram (n/a)        | OPT<br>(16)                              | 1994 CDC | Co-morbid MDD                                               | 10-20 mg of S-citalopram daily for up to 12 weeks                                                                                                                                                                                                                                                                    | <b>PROMs</b><br>1) Fatigue (CFQ, FIS)<br>2) PEM (CFS-SR)<br>3) Sore throat (CFS-SR)<br>4) Tender lymph nodes (CFS-SR)<br>5) muscle pain (CFS-SR)<br>6) Joint pain (CFS-SR)<br>7) Headache (CFS-SR)<br>8) Sleep (CFS-SR)<br>9) Cognitive function (CFS-SR)<br>10) CFS severity (CGI subscale) | <b>PROMs</b><br>1) $p<0.0005$<br>2) $p=0.001$<br>3) $p=0.005$<br>4) N.S.<br>5) $p=0.001$<br>6) $p=0.025$<br>7) $p<0.0005$<br>8) $p<0.0005$<br>9) $p<0.0005$<br>10) $p<0.0005$ | [176] |

---

|                                    |                  |
|------------------------------------|------------------|
| 11) CFS improvement (CGI subscale) | 11) $p < 0.0005$ |
| 12) Depression (HAM-D, BDI)        | 12) $p < 0.0005$ |
| 13) MDD severity (CGI subscale)    | 13) $p = 0.001$  |
| 14) MDD improvement (CGI subscale) | 14) $p < 0.0005$ |

---

#### Abbreviations:

1988 CDC: 1988 Centers for Disease Control and Prevention criteria for CFS by Holmes, 1994 CDC: 1994 CDC criteria for CFS by Fukuda, ADHDRS: attention deficit hyperactivity disorder rating scale, BAI: Beck anxiety inventory, BDI: Beck depression inventory, BP: blood pressure, BPI: brief pain inventory, BPM: beats per minute, BRIEF-A: behavior rating inventory of executive function-adult, CDC-SI: CDC symptom inventory scores, CES-D: Centers for Epidemiological Studies depression scale, CFQ: Chalder fatigue questionnaire, CFS-SR: CFS symptom rating, CGI: clinical global impressions, CO: cross-over, COMPASS31: composite autonomic symptom score 31-items questionnaire, CIS: checklist of individual strength, DASI: Duke activity status index, FIS: fatigue impact scale, FIQ: fibromyalgia impact questionnaire, FSQ: functional status questionnaire, FSS: fatigue severity scale, GET: graded exercise therapy, GWS: global wellness scale, HADS: hospital anxiety and depression scale, HAM-A: Hamilton anxiety rating scale, HAM-D: Hamilton depression rating scale, HGS: hand grip strength, HR: heart rate, ISS: illness severity scale, LDX: Lisdexamfetamine Dimesylate, MDD: major depressive disorder, MFI-20: 20-item multidimensional fatigue inventory, MHLC: multidimension health locus of control, MPQ: McGill pain questionnaire, n/a: not available, N.S. not significant, OPT: open-label pilot study, PA: parallel-arm, PANAS: positive and negative effect scale, PGI-I: patient global impression of improvement, POMS-SF: profile of mood states - short form, PROMs: patient-reported outcome measures, PSQI: Pittsburgh sleep quality index, RCT: randomized placebo-controlled double-blinded clinical trial, SF-36: 36-item short form health survey, SIP: sickness impact profile, SLQ: sexual life quality questionnaire, Sx: 16-question Symptom Checklist, UGWS: unidimensional global wellness scale, VAS: visual analogue scale, WHOQOL: World Health Organization quality of life questionnaire, WMFI: Wood mental fatigue inventory.

#### Trial codes:

NCT: ClinicalTrials.gov

#### Footnotes:

\* Marks a primary outcome measure

† Total combined score from more than one measure to assess a domain

‡ Function work capacity defined as the amount of oxygen consumed in the last minute of exercise per kg of body weight

§  $p$  values for fluoxetine treatment reported

¶ The dose of fludrocortisone was double if participants reported no improvement at week 2.

# Distance walked before exhaustion was ascertained using a 5-point rating scale: 1 point – 1 block, 2 points – 1-3 blocks, 3 points – 3 to 8 blocks, 4 points – 1 to 3 miles, 5 points – 3 miles or more.

## Comparisons are between the active vs placebo phases of the study

**Supplementary Table S6:** Clinical trials investigating treatments for neuroendocrine disturbances in ME/CFS.

| Intervention<br>(Trial code) | Study design<br>(Cohort size)        | Diagnostic<br>criteria   | Patient subgroup                                            | Treatment regime                                                                                                                                                                                                                | Outcome measures                                                                                                                                                                                                                                                                                                                                                                   | Outcome significance                                                                                                                                                                                                                                            | Reference |
|------------------------------|--------------------------------------|--------------------------|-------------------------------------------------------------|---------------------------------------------------------------------------------------------------------------------------------------------------------------------------------------------------------------------------------|------------------------------------------------------------------------------------------------------------------------------------------------------------------------------------------------------------------------------------------------------------------------------------------------------------------------------------------------------------------------------------|-----------------------------------------------------------------------------------------------------------------------------------------------------------------------------------------------------------------------------------------------------------------|-----------|
| CT38<br>(NCT03613129)        | OPT<br>(17)                          | 1994 CDC,<br>CCC and IoM | -                                                           | Subcutaneous infusion of CT38, with doses at:<br>0.20 µg/kg/hour, for 3 hours for 2 days<br>0.03 µg/kg/hour, for 3.5 hours for 3 days<br>0.06 µg/kg/hour, for 3.5 hours for 3 days<br>0.01 µg/kg/hour, for 3.5 hours for 3 days | <b>PROMs</b><br>1) Symptoms (TDSS)<br>2) Physical Health (SF-36-PCS)<br>3) Mental Health (SF-36-MCS)                                                                                                                                                                                                                                                                               | <b>PROMs</b><br>1) $p=0.011$<br>2) $p=0.005$<br>3) N.S.                                                                                                                                                                                                         | [235]     |
| DHEA<br>(n/a)                | OPT<br>(23)                          | 1988 CDC                 | Suboptimal serum<br>levels of DHEA-<br>sulphate (<2.0µg/mL) | 25 mg/day DHEA for 6 months†                                                                                                                                                                                                    | <b>PROMs</b><br>1) Functional disability (MHAQII)<br>2) Pain‡<br>3) Fatigue‡<br>4) Satisfaction with activity level‡<br>5) Coping with the illness‡<br>6) Feelings of helplessness‡<br>7) Depression‡<br>8) Anxiety‡<br>9) Thinking‡<br>10) Memory‡<br>11) Sexual problems‡<br><br><b>Biological endpoints</b><br>1) Free testosterone<br>2) Total cholesterol<br>3) LDL<br>4) HDL | <b>PROMs</b><br>1) n/a<br>2) $p=0.035$<br>3) $p=0.009$<br>4) $p=0.033$<br>5) N.S.<br>6) $p=0.015$<br>7) N.S.<br>8) $p<0.01$<br>9) $p<0.01$<br>10) $p<0.05$<br>11) N.S.<br><br><b>Biological endpoints</b><br>1) $p=0.001$<br>2) N.S.<br>3) N.S.<br>4) $p=0.016$ | [228]     |
| GH<br>(n/a)                  | RCT (PA)<br>(GH: 10,<br>Placebo: 10) | 1994 CDC                 | Nocturnal peak of<br><10 µg/L of GH                         | 6.7 µg/kg GH per day for 12 weeks.<br><br>Following treatment period, the 17<br>patients remaining were given the above<br>concentration of GH for 9 months                                                                     | <b>PROMs</b><br>1) Quality of Life (NHP, QoL-<br>AGHDA)<br><br><b>Objective measures</b><br>1) Weight<br>2) Muscle Strength<br>3) Skinfold Thickness<br>4) Fat-free mass<br>5) Total body water<br>6) Fat mass<br>7) BMI                                                                                                                                                           | <b>PROMs</b><br>1) N.S.<br><br><b>Objective measures</b><br>1) N.S.<br>2) N.S.<br>3) N.S.<br>4) $p=0.006$<br>5) $p=0.003$<br>6) N.S.<br>7) N.S.                                                                                                                 | [229]     |

|                               |                                            |          |   |                                                                                               |                                                                                                                                                                                                                                                                                                                                      |                                                                                                                                      |       |
|-------------------------------|--------------------------------------------|----------|---|-----------------------------------------------------------------------------------------------|--------------------------------------------------------------------------------------------------------------------------------------------------------------------------------------------------------------------------------------------------------------------------------------------------------------------------------------|--------------------------------------------------------------------------------------------------------------------------------------|-------|
|                               |                                            |          |   |                                                                                               | <b>Biological endpoints</b><br>1) Hormone levels (IGF-I)<br>2) Hormone levels (Thyrotrophin, tri-iodo thyronine, thyroxine, prolactin, cortisol, follicle-stimulating hormone, lutenizing hormone, testosterone)<br>3) Serum Lipoprotein(a)<br>4) Amino acids (Tyrosine, valine, tryptophane, phenylalanine, isoleucine and leucine) | <b>Biological endpoints</b><br>1) $p<0.001$<br>2) N.S.<br>3) $p=0.003$<br>4) $p<0.005$                                               |       |
| Low-dose hydrocortisone (n/a) | RCT (PA) (Hydrocortisone: 35, Placebo: 35) | 1994 CDC | - | 16 mg/m <sup>2</sup> /day hydrocortisone per day, 20-30mg at 8AM and 5 mg at 2PM for 12 weeks | <b>PROMs</b><br>1) Wellness (SI-GHS)<br>2) Mood (POMS)<br>3) Symptoms (SCL-90R)<br>4) Sickness (SIP)<br>5) Depression (BDI)<br>6) Activity (AS-10)<br><br><b>Biological endpoints</b><br>1) Resting and cosyntropin-stimulated cortisol levels                                                                                       | <b>PROMs</b><br>1) $p<0.01$<br>2) N.S.<br>3) N.S.<br>4) N.S.<br>5) N.S.<br>6) N.S.<br><br><b>Biological endpoints</b><br>1) $p<0.01$ | [225] |
| Low-dose hydrocortisone (n/a) | RCT (CO) (Hydrocortisone: 16, Placebo: 16) | 1994 CDC |   | 5 – 10 mg hydrocortisone, once per day for 28 weeks                                           | <b>PROMs</b><br>1) Fatigue (FS-11)<br>2) Disability (WSAS)<br>3) Health related quality of life (SF-36)<br>4) Psychological symptoms (GHQ)<br><br><b>Biological endpoints</b><br>1) 24h urinary free cortisol<br>2) Insulin stress test                                                                                              | <b>PROMs</b><br>1) $p=0.04$<br>2) $p=0.006$<br>3) N.S.<br>4) $p=0.003$<br><br><b>Biological endpoints</b><br>1) N.S.<br>2) $p=0.52$  | [226] |

#### Abbreviations:

1988 CDC: 1988 Centers for Disease Control and Prevention criteria for CFS by Holmes, 1994 CDC: 1994 CDC criteria for CFS by Fukuda, ACTH: adrenocorticotrophic hormone, AS-10: 10-point activity scale, BDI: Beck depression inventory, BMI: body mass index, CCC: Canadian consensus criteria for ME/CFS by Carruthers, CGI-21: clinical global impression scale-21, CO: cross-over, DHEA: dehydroepiandrosterone, FS-11: 11-item fatigue scale, GH: growth hormone, GHQ: general health questionnaire, hCRH: human corticotropin-related hormone, HDL: high density lipoprotein, IGF-I: insulin-like growth factor-I, IoM: Institute of Medicine, LDL: low density lipoprotein, MHAQII: modified health assessment questionnaire version 2, NCT: ClinicalTrials.gov study identifier, NHP: Nottingham health profile, n/a: not available, N.S.: not significant, OPT: open-label pilot study, POMS: profile of mood states, PROMS: patient-reported outcome measures, QoL-AGHDA: quality of life assessment in GH-deficient adults, RCT: randomized placebo-controlled double-blinded clinical trial, SCL-90R: Symptom Checklist-90-R, SF-36: 36-item short form health survey, SF-36-MCS: SF-36 – mental component summary, SF-36-PCS: SF-36 – physical component summary, SI-GHS: single item global health scale, SIP: sickness impact profile, TDSS: total daily symptom scores, WSAS: work and social adjustment scale.

**Trial codes:**

NCT: ClinicalTrials.gov

**Footnotes:**

† Dosage of DHEA increased by increments of 25mg/day to a maximum of 100mg/day in participants whose DHEA-sulphate levels remained <2 µg/mL or no clinical response

‡ Assessment tool not reported
